# Supplementary material
Source: publisher figshare collection journal article supplement (https://gsapubs.figshare.com/ndownloader/files/23305565)
Supplement: Supplementary file 1 [file 23305565]

## Sheet: Sheet1
Table DR2 - Plagioclase Transect Chemistry
Explanation: Each sample name corresponds to a single spot analysis along a transect within a given plagioclase grain. For example, 214H1-plag1a corresponds to sample 214H1 (see Table 1), 'plag1' denotes the plagioclase grain within sample 214H1, and 'a' indicates the spot. Thus, 214H1-plag1a was the first shot made in plagioclase 1 within sample 214H1.
	214H1-plag1a	214H1-plag1b	214H1-plag1c	214H1-plag1d	214H1-plag1e	214H1-plag1f	214H1-plag1g	214H1-plag1h	214H1-plag1i	214H1-plag1j	214H1-plag1k	214H1-plag1l	214H1-plag1m	214H1-plag1n	214H1-plag1o	214H1-plag1p	214H1-plag1q	214H1-plag1r	214H1-plag1s	214H1-plag1t	214H1-plag1u	214H1-plag1v	214H1-plag1w	214H1-plag1x	214H1-plag1y	214H1-plag1z	214H1-plag1aa	214H1-plag1ab	214H1-plag1ac	214H1-plag1ad	214H1-plag1ae	214H1-plag1af	214H1-plag1ag	214H1-plag1ah	214H1-plag1ai	214H1-plag1aj	214H1-plag1ak	214H1-plag1al	214H1-plag1am	214H1-plag1an	214H1-plag1ao	214H1-plag1ap	214H1-plag1aq	214H1-plag1ar	214H1-plag1at	214H1-plag1au	214H1-plag1av	214H1-plag1aw	214H1-plag1ax
x-coordinate	32.565	32.613	32.652	32.689	32.731	32.778	32.816	32.86	32.906	32.957	33.008	33.057	33.109	33.151	33.197	33.244	33.295	33.347	33.448	33.499	33.545	33.594	33.619	33.672	33.714	33.755	33.796	33.839	33.883	33.931	33.981	34.021	34.079	34.152	34.196	34.219	34.282	34.333	34.383	34.436	34.484	34.537	34.584	34.642	34.745	34.8	34.857	34.881	34.937
y-coordinate	20.062	20.081	20.107	20.133	20.154	20.179	20.206	20.227	20.252	20.273	20.298	20.325	20.338	20.355	20.376	20.396	20.422	20.445	20.383	20.409	20.428	20.449	20.524	20.538	20.564	20.593	20.617	20.636	20.662	20.688	20.716	20.782	20.798	20.777	20.795	20.87	20.865	20.886	20.91	20.939	20.962	20.989	21.009	21.034	21.078	21.099	21.08	21.123	21.136
Distance (mm)	0	0.0516236	0.0984958	0.143717	0.190675	0.24391	0.290526	0.33928	0.391635	0.446789	0.503587	0.559533	0.613134	0.658444	0.709011	0.760089	0.817334	0.874193	0.992705	1.04995	1.09972	1.15303	1.23209	1.2869	1.3363	1.38652	1.43403	1.48104	1.53215	1.58674	1.64404	1.72122	1.78138	1.85734	1.90488	1.98333	2.04653	2.10168	2.15715	2.21756	2.27079	2.33027	2.38135	2.4445	2.55651	2.61538	2.67547	2.72471	2.7822
An (mole %)	43.1637	44.0679	44.166	44.6816	37.9753	41.3603	43.3585	39.4978	40.7376	41.3212	45.2939	41.3242	40.0819	42.2987	40.1503	40.3516	39.2039	38.1401	41.4425	39.8175	39.9835	39.622	42.4434	42.1393	40.1268	45.0026	43.4871	43.0293	36.9785	37.5226	37.0004	37.3779	40.7587	38.4188	34.4518	42.1336	40.9459	39.4915	35.4383	39.5624	39.1465	39.6389	36.4231	39.0301	36.5007	42.3414	36.1322	41.6255	38.3086
Ab (mole %)	56.2565	55.0938	54.8994	54.0523	60.9469	57.6097	55.1552	59.2509	57.9642	57.4255	53.5123	57.6102	58.869	55.7131	58.7272	58.2348	59.4939	60.7121	57.6188	59.1968	58.8502	59.2517	56.3286	56.8945	58.981	53.9512	55.2606	55.9381	61.6693	61.3966	61.9983	61.3486	58.2674	60.1962	64.2723	56.236	57.7479	59.1536	63.2102	58.9943	59.595	59.3209	62.5109	59.7066	62.0747	56.5944	62.9234	57.531	61.0518
Or (mole %)	0.579785	0.83823	0.934607	1.26611	1.07782	1.03002	1.48633	1.25131	1.29828	1.25322	1.1938	1.06555	1.04908	1.98822	1.12253	1.41359	1.30219	1.14786	0.938769	0.985747	1.16625	1.12636	1.22806	0.966155	0.89218	1.04621	1.25227	1.03265	1.35219	1.08082	1.00128	1.2735	0.973946	1.38491	1.27588	1.63042	1.30616	1.35486	1.35148	1.44329	1.25851	1.04019	1.06598	1.2633	1.42457	1.06415	0.944392	0.843475	0.639649
Mg (ppm)	8.93183	5.8089	10.7653	3.68981	9.7397	5.43736	4.75826	11.0768	3.27824	4.79001	5.88606	8.49427	6.7848	2.58984	6.41764	6.90146	3.47794	3.26893	2.96936	6.99541	2.49749	4.14475	5.63912	2.7957	3.52154	4.52254	3.25164	5.33911	4.28512	20.1455	10.5742	5.31838	4.07933	6.87416	7.14394	6.22586	8.20505	4.28184	4.21024	7.36672	5.57802	4.04092	2.37648	0.904336	3.29624	4.00551	4.35439	4.43789	4.8045
Fe (ppm)	401.211	691.243	751.19	869.455	899.177	930.25	968.414	1050.77	872.786	831.629	705.21	680.501	723.431	745.373	833.51	799.744	857.968	714.161	497.082	636.102	683.858	901.973	976.621	829.259	603.963	689.304	825.036	754.929	842.618	1147.23	990.523	918.422	821.267	962.854	1148.15	1136.01	1209.22	995.667	909.765	986.722	880.262	713.315	727.197	686.741	889.11	667.231	707.846	595.865	420.746
Sr (ppm)	424.909	391.207	350.248	307.173	380.845	347.687	321.674	356.23	338.864	341.485	359.937	361.802	331.494	323.44	352.915	338.229	364.181	316.636	322.094	333.2	360.037	319.853	366.356	348.95	396.825	371.587	313.154	366.362	321.822	345.777	335.451	317.456	293.208	340.131	340.911	341.394	310.387	313.796	336.636	334.566	351.534	350.127	291.113	349.329	325.851	353.273	335.787	355.787	359.964
[truncated: 154 more columns]
